# Supplementary material
Source: PubMed Central journal article supplement (PMC4590454)
Supplement: rspb20150654supp1.pdf [file rspb20150654supp1.pdf]

| Class          | Order             | Family          | Species                    | Age at maturity (years) | Annual mortality | rmax | Generation time (years) |
|----------------|-------------------|-----------------|----------------------------|-------------------------|------------------|------|-------------------------|
| Chondrichthyes | Carcharhiniformes | Carcharhinidae  | Carcharhinus_acronotus     | 5.4                     | 0.37             | 0.20 | 8.1                     |
| Chondrichthyes | Carcharhiniformes | Carcharhinidae  | Carcharhinus_amblyrhynchos | 7.0                     | 0.28             | 0.20 | 10.6                    |
| Chondrichthyes | Carcharhiniformes | Carcharhinidae  | Carcharhinus_brachyurus    | 22.7                    | 0.08             | 0.15 | 35.2                    |
| Chondrichthyes | Carcharhiniformes | Carcharhinidae  | Carcharhinus_brachyurus    | 21.0                    | 0.08             | 0.15 | 33.5                    |
| Chondrichthyes | Carcharhiniformes | Carcharhinidae  | Carcharhinus_brevipinna    | 10.3                    | 0.18             | 0.24 | 15.8                    |
| Chondrichthyes | Carcharhiniformes | Carcharhinidae  | Carcharhinus_brevipinna    | 8.7                     | 0.21             | 0.26 | 13.5                    |
| Chondrichthyes | Carcharhiniformes | Carcharhinidae  | Carcharhinus_cautus        | 6.9                     | 0.28             | 0.20 | 10.5                    |
| Chondrichthyes | Carcharhiniformes | Carcharhinidae  | Carcharhinus_falciformis   | 7.5                     | 0.25             | 0.30 | 11.5                    |
| Chondrichthyes | Carcharhiniformes | Carcharhinidae  | Carcharhinus_falciformis   | 13.0                    | 0.14             | 0.18 | 20.1                    |
| Chondrichthyes | Carcharhiniformes | Carcharhinidae  | Carcharhinus_galapagensis  | 8.8                     | 0.21             | 0.27 | 13.5                    |
| Chondrichthyes | Carcharhiniformes | Carcharhinidae  | Carcharhinus_isodon        | 5.3                     | 0.38             | 0.22 | 7.9                     |
| Chondrichthyes | Carcharhiniformes | Carcharhinidae  | Carcharhinus_leucas        | 18.9                    | 0.09             | 0.13 | 30.0                    |
| Chondrichthyes | Carcharhiniformes | Carcharhinidae  | Carcharhinus_leucas        | 10.9                    | 0.17             | 0.26 | 16.8                    |
| Chondrichthyes | Carcharhiniformes | Carcharhinidae  | Carcharhinus_leucas        | 21.9                    | 0.08             | 0.13 | 34.4                    |
| Chondrichthyes | Carcharhiniformes | Carcharhinidae  | Carcharhinus_limbatus      | 7.5                     | 0.25             | 0.19 | 11.5                    |
| Chondrichthyes | Carcharhiniformes | Carcharhinidae  | Carcharhinus_limbatus      | 7.7                     | 0.25             | 0.19 | 11.7                    |
| Chondrichthyes | Carcharhiniformes | Carcharhinidae  | Carcharhinus_limbatus      | 8.0                     | 0.24             | 0.25 | 12.2                    |
| Chondrichthyes | Carcharhiniformes | Carcharhinidae  | Carcharhinus_longimanus    | 7.5                     | 0.25             | 0.23 | 11.5                    |
| Chondrichthyes | Carcharhiniformes | Carcharhinidae  | Carcharhinus_longimanus    | 5.5                     | 0.37             | 0.35 | 8.2                     |
| Chondrichthyes | Carcharhiniformes | Carcharhinidae  | Carcharhinus_obscurus      | 23.0                    | 0.08             | 0.10 | 35.5                    |
| Chondrichthyes | Carcharhiniformes | Carcharhinidae  | Carcharhinus_obscurus      | 21.5                    | 0.08             | 0.12 | 34.0                    |
| Chondrichthyes | Carcharhiniformes | Carcharhinidae  | Carcharhinus_obscurus      | 22.0                    | 0.08             | 0.12 | 34.5                    |
| Chondrichthyes | Carcharhiniformes | Carcharhinidae  | Carcharhinus_plumbeus      | 8.8                     | 0.21             | 0.24 | 13.5                    |
| Chondrichthyes | Carcharhiniformes | Carcharhinidae  | Carcharhinus_plumbeus      | 16.4                    | 0.11             | 0.16 | 25.5                    |
| Chondrichthyes | Carcharhiniformes | Carcharhinidae  | Carcharhinus_porosus       | 7.0                     | 0.28             | 0.30 | 10.6                    |
| Chondrichthyes | Carcharhiniformes | Carcharhinidae  | Carcharhinus_signatus      | 11.0                    | 0.17             | 0.22 | 16.9                    |
| Chondrichthyes | Carcharhiniformes | Carcharhinidae  | Carcharhinus_sorrah        | 3.3                     | 0.66             | 0.53 | 4.8                     |
| Chondrichthyes | Carcharhiniformes | Carcharhinidae  | Carcharhinus_tilstoni      | 4.3                     | 0.47             | 0.38 | 6.5                     |
| Chondrichthyes | Carcharhiniformes | Carcharhinidae  | Galeocerdo_cuvier          | 9.3                     | 0.21             | 0.37 | 14.0                    |
| Chondrichthyes | Carcharhiniformes | Carcharhinidae  | Galeocerdo_cuvier          | 12.3                    | 0.15             | 0.32 | 19.0                    |
| Chondrichthyes | Carcharhiniformes | Carcharhinidae  | Galeocerdo_cuvier          | 11.3                    | 0.17             | 0.29 | 17.2                    |
| Chondrichthyes | Carcharhiniformes | Carcharhinidae  | Isogomphodon_oxyrhynchus   | 7.5                     | 0.25             | 0.21 | 11.5                    |
| Chondrichthyes | Carcharhiniformes | Carcharhinidae  | Negaprion_brevirostris     | 13.7                    | 0.13             | 0.20 | 21.4                    |
| Chondrichthyes | Carcharhiniformes | Carcharhinidae  | Prionace_glauca            | 5.8                     | 0.33             | 0.67 | 8.8                     |
| Chondrichthyes | Carcharhiniformes | Carcharhinidae  | Prionace_glauca            | 5.9                     | 0.33             | 0.71 | 8.9                     |
| Chondrichthyes | Carcharhiniformes | Carcharhinidae  | Rhizoprionodon_taylori     | 3.0                     | 0.83             | 0.63 | 4.2                     |
| Chondrichthyes | Carcharhiniformes | Carcharhinidae  | Rhizoprionodon_terraenovae | 2.6                     | 1.03             | 0.67 | 3.5                     |
| Chondrichthyes | Carcharhiniformes | Carcharhinidae  | Rhizoprionodon_terraenovae | 3.3                     | 0.70             | 0.53 | 4.7                     |
| Chondrichthyes | Carcharhiniformes | Scyliorhinidae  | Scyliorhinus_canicula      | 7.9                     | 0.21             | 0.52 | 12.7                    |
| Chondrichthyes | Carcharhiniformes | Scyliorhinidae  | Scyliorhinus_retifer       | 8.5                     | 0.19             | 0.47 | 13.8                    |
| Chondrichthyes | Carcharhiniformes | Sphyrnidae      | Sphyrna_lewini             | 16.9                    | 0.10             | 0.18 | 26.9                    |
| Chondrichthyes | Carcharhiniformes | Sphyrnidae      | Sphyrna_lewini             | 4.9                     | 0.40             | 0.55 | 7.4                     |
| Chondrichthyes | Carcharhiniformes | Sphyrnidae      | Sphyrna_tiburo             | 3.3                     | 0.57             | 0.80 | 5.1                     |
| Chondrichthyes | Carcharhiniformes | Sphyrnidae      | Sphyrna_tiburo             | 3.3                     | 0.57             | 0.80 | 5.1                     |
| Chondrichthyes | Carcharhiniformes | Sphyrnidae      | Sphyrna_tiburo             | 4.4                     | 0.41             | 0.63 | 6.9                     |
| Chondrichthyes | Carcharhiniformes | Triakidae       | Furgaleus_macki            | 7.2                     | 0.25             | 0.38 | 11.2                    |
| Chondrichthyes | Carcharhiniformes | Triakidae       | Galeorhinus_galeus         | 16.7                    | 0.11             | 0.19 | 25.8                    |
| Chondrichthyes | Carcharhiniformes | Triakidae       | Galeorhinus_galeus         | 15.0                    | 0.12             | 0.23 | 23.3                    |
| Chondrichthyes | Carcharhiniformes | Triakidae       | Mustelus_antarcticus       | 7.4                     | 0.26             | 0.38 | 11.2                    |
| Chondrichthyes | Carcharhiniformes | Triakidae       | Mustelus_californicus      | 3.4                     | 0.66             | 0.70 | 4.9                     |
| Chondrichthyes | Carcharhiniformes | Triakidae       | Mustelus_canis             | 5.4                     | 0.38             | 0.51 | 8.0                     |
| Chondrichthyes | Carcharhiniformes | Triakidae       | Mustelus_lenticulatus      | 8.4                     | 0.22             | 0.39 | 13.0                    |
| Chondrichthyes | Carcharhiniformes | Triakidae       | Mustelus_manazo            | 4.3                     | 0.47             | 0.48 | 6.5                     |
| Chondrichthyes | Carcharhiniformes | Triakidae       | Mustelus_manazo            | 5.5                     | 0.37             | 0.45 | 8.2                     |
| Chondrichthyes | Carcharhiniformes | Triakidae       | Mustelus_manazo            | 4.9                     | 0.41             | 0.50 | 7.4                     |
| Chondrichthyes | Carcharhiniformes | Triakidae       | Mustelus_manazo            | 5.0                     | 0.41             | 0.52 | 7.4                     |
| Chondrichthyes | Carcharhiniformes | Triakidae       | Mustelus_manazo            | 5.5                     | 0.30             | 0.41 | 8.8                     |
| Chondrichthyes | Carcharhiniformes | Triakidae       | Mustelus_mustelus          | 14.3                    | 0.12             | 0.21 | 22.7                    |
| Chondrichthyes | Carcharhiniformes | Triakidae       | Triakis_semifasciata       | 13.4                    | 0.13             | 0.29 | 21.1                    |
| Chondrichthyes | Chimaeriformes    | Callorhynchidae | Callorhynchus_capensis     | 4.2                     | 0.39             | 0.67 | 6.8                     |
| Chondrichthyes | Hexanchiformes    | Hexanchidae     | Notorynchus_cepedianus     | 17.0                    | 0.10             | 0.26 | 27.0                    |
| Chondrichthyes | Lamniformes       | Alopiidae       | Alopias_pelagicus          | 9.6                     | 0.19             | 0.13 | 14.9                    |
| Chondrichthyes | Lamniformes       | Alopiidae       | Alopias_supercilius        | 13.9                    | 0.13             | 0.15 | 21.5                    |
| Chondrichthyes | Lamniformes       | Lamnidae        | Carcharodon_carcharias     | 13.5                    | 0.13             | 0.19 | 21.2                    |
| Chondrichthyes | Lamniformes       | Lamnidae        | Isurus_oxyrinchus          | 20.5                    | 0.09             | 0.12 | 31.6                    |
| Chondrichthyes | Lamniformes       | Lamnidae        | Isurus_oxyrinchus          | 21.1                    | 0.09             | 0.13 | 32.2                    |
| Chondrichthyes | Lamniformes       | Lamnidae        | Isurus_oxyrinchus          | 20.0                    | 0.09             | 0.13 | 31.1                    |
| Chondrichthyes | Lamniformes       | Lamnidae        | Lamna_ditropis             | 8.3                     | 0.22             | 0.13 | 12.8                    |
| Chondrichthyes | Lamniformes       | Lamnidae        | Lamna_ditropis             | 9.8                     | 0.18             | 0.15 | 15.3                    |
| Chondrichthyes | Lamniformes       | Lamnidae        | Lamna_nasus                | 17.2                    | 0.10             | 0.13 | 27.2                    |
| Chondrichthyes | Lamniformes       | Lamnidae        | Lamna_nasus                | 13.8                    | 0.13             | 0.18 | 21.5                    |
| Chondrichthyes | Lamniformes       | Odontaspidae    | Carcharias_taurus          | 10.3                    | 0.17             | 0.08 | 16.2                    |
| Chondrichthyes | Myliobatiformes   | Dasyatidae      | Dasyatis_dipterura         | 9.7                     | 0.17             | 0.17 | 15.6                    |
| Chondrichthyes | Myliobatiformes   | Dasyatidae      | Dasyatis_pastinaca         | 4.8                     | 0.37             | 0.41 | 7.5                     |
| Chondrichthyes | Myliobatiformes   | Myliobatidae    | Aetobatus_flagellum        | 7.0                     | 0.28             | 0.28 | 10.6                    |
| Chondrichthyes | Myliobatiformes   | Myliobatidae    | Myliobatis_californicus    | 5.9                     | 0.33             | 0.41 | 8.9                     |
| Chondrichthyes | Myliobatiformes   | Rhinopteridae   | Rhinoptera_bonassus        | 5.5                     | 0.37             | 0.07 | 8.2                     |
| Chondrichthyes | Myliobatiformes   | Rhinopteridae   | Rhinoptera_bonassus        | 8.5                     | 0.22             | 0.08 | 13.0                    |
| Chondrichthyes | Myliobatiformes   | Urolophidae     | Trygonoptera_mucosa        | 5.9                     | 0.33             | 0.16 | 9.0                     |
| Chondrichthyes | Myliobatiformes   | Urolophidae     | Urolophus_lobatus          | 3.8                     | 0.55             | 0.17 | 5.6                     |
| Chondrichthyes | Myliobatiformes   | Urolophidae     | Urolophus_paucimaculatus   | 5.9                     | 0.33             | 0.16 | 9.0                     |
| Chondrichthyes | Orectolobiformes  | Hemiscyllidae   | Chiloscyllium_plagiosum    | 4.5                     | 0.37             | 0.55 | 7.2                     |
| Chondrichthyes | Pristiformes      | Pristidae       | Pristis_perotteti          | 10.4                    | 0.17             | 0.22 | 16.3                    |
| Chondrichthyes | Rajiformes        | Rajidae         | Dipturus_chilensis         | 13.5                    | 0.12             | 0.33 | 21.8                    |
| Chondrichthyes | Rajiformes        | Rajidae         | Dipturus_chilensis         | 14.4                    | 0.11             | 0.31 | 23.5                    |
| Chondrichthyes | Rajiformes        | Rajidae         | Dipturus_chilensis         | 12.8                    | 0.13             | 0.37 | 20.4                    |
| Chondrichthyes | Rajiformes        | Rajidae         | Dipturus_trachydermus      | 17.4                    | 0.09             | 0.27 | 28.5                    |
| Chondrichthyes | Rajiformes        | Rajidae         | Leucoraja_erinacea         | 6.8                     | 0.24             | 0.58 | 10.9                    |
| Chondrichthyes | Rajiformes        | Rajidae         | Leucoraja_naevus           | 9.0                     | 0.18             | 0.51 | 14.6                    |
| Chondrichthyes | Rajiformes        | Rajidae         | Leucoraja_ocellata         | 9.5                     | 0.17             | 0.49 | 15.4                    |
| Chondrichthyes | Rajiformes        | Rajidae         | Raja_asterias              | 4.1                     | 0.40             | 1.04 | 6.6                     |
| Chondrichthyes | Rajiformes        | Rajidae         | Raja_binoculata            | 8.0                     | 0.21             | 0.86 | 12.8                    |
| Chondrichthyes | Rajiformes        | Rajidae         | Raja_brachyura             | 5.5                     | 0.30             | 0.77 | 8.8                     |
| Chondrichthyes | Rajiformes        | Rajidae         | Raja_clavata               | 6.1                     | 0.27             | 0.78 | 9.8                     |
| Chondrichthyes | Rajiformes        | Rajidae         | Raja_clavata               | 5.0                     | 0.33             | 0.80 | 8.0                     |
| Chondrichthyes | Rajiformes        | Rajidae         | Raja_microocellata         | 5.0                     | 0.33             | 0.76 | 8.0                     |
| Chondrichthyes | Rajiformes        | Rajidae         | Raja_miraletus             | 2.6                     | 0.63             | 1.49 | 4.2                     |
| Chondrichthyes | Rajiformes        | Rajidae         | Raja_montagui              | 5.0                     | 0.33             | 0.76 | 8.0                     |
| Chondrichthyes | Rajiformes        | Rajidae         | Raja_montagui              | 4.1                     | 0.40             | 0.90 | 6.6                     |
| Chondrichthyes | Rhinobatiformes   | Rhinobatidae    | Rhinobatos_productus       | 8.0                     | 0.24             | 0.36 | 12.2                    |
| Chondrichthyes | Squaliformes      | Centrophoridae  | Centrophorus_squamosus     | 46.0                    | 0.04             | 0.07 | 71.0                    |
| Chondrichthyes | Squaliformes      | Centrophoridae  | Deania_calcea              | 29.3                    | 0.06             | 0.09 | 46.0                    |
| Chondrichthyes | Squaliformes      | Dalatiidae      | Dalatias_licha             | 8.8                     | 0.24             | 0.21 | 13.0                    |
| Chondrichthyes | Squaliformes      | Etmopteridae    | Etmopterus_baxteri         | 31.0                    | 0.06             | 0.09 | 47.7                    |
| Chondrichthyes | Squaliformes      | Etmopteridae    | Etmopterus_spinax          | 11.0                    | 0.17             | 0.18 | 16.9                    |
| Chondrichthyes | Squaliformes      | Squalidae       | Squalus_acanthias          | 16.6                    | 0.11             | 0.16 | 25.7                    |
| Chondrichthyes | Squaliformes      | Squalidae       | Squalus_acanthias          | 16.8                    | 0.11             | 0.17 | 25.9                    |
| Chondrichthyes | Squaliformes      | Squalidae       | Squalus_acanthias          | 14.1                    | 0.14             | 0.19 | 21.2                    |
| Chondrichthyes | Squaliformes      | Squalidae       | Squalus_acanthias          | 37.4                    | 0.05             | 0.09 | 57.4                    |
| Chondrichthyes | Squaliformes      | Squalidae       | Squalus_acanthias          | 7.0                     | 0.33             | 0.31 | 10.0                    |
| Chondrichthyes | Squaliformes      | Squalidae       | Squalus_blainvillei        | 6.5                     | 0.32             | 0.20 | 9.6                     |
| Chondrichthyes | Squaliformes      | Squalidae       | Squalus_megalops           | 17.0                    | 0.11             | 0.13 | 26.1                    |
| Chondrichthyes | Squaliformes      | Squalidae       | Squalus_mitsukurii         | 17.0                    | 0.11             | 0.16 | 26.1                    |
| Chondrichthyes | Squatiformes      | Squatinaidae    | Squatina_californica       | 10.8                    | 0.17             | 0.26 | 16.7                    |
| Chondrichthyes | Squatiformes      | Squatinaidae    | Squatina_guggenheim        | 5.0                     | 0.41             | 0.23 | 7.4                     |
| Chondrichthyes | Squatiformes      | Squatinaidae    | Squatina_occulta           | 11.0                    | 0.17             | 0.14 | 16.9                    |
| Chondrichthyes | Torpediniformes   | Torpedinidae    | Torpedo_californica        | 9.8                     | 0.18             | 0.27 | 15.4                    |
| Chondrichthyes | Torpediniformes   | Torpedinidae    | Torpedo_marmorata          | 13.3                    | 0.13             | 0.19 | 21.0                    |
| Mammalia       | Artiodactyla      | Bovidae         | Aepyceros_melampus         | 2.0                     | 0.24             | 0.16 | 6.2                     |
| Mammalia       | Artiodactyla      | Bovidae         | Hemitragus_jemlahicus      | 2.6                     | 0.23             | 0.28 | 7.0                     |
| Mammalia       | Artiodactyla      | Bovidae         | Kobus_ellipsiprymnus       | 1.8                     | 0.18             | 0.25 | 7.3                     |
| Mammalia       | Artiodactyla      | Bovidae         | Kobus_kob                  | 1.8                     | 0.38             | 0.21 | 4.4                     |
| Mammalia       | Artiodactyla      | Bovidae         | Ovis_dalli                 | 2.8                     | 0.18             | 0.13 | 8.3                     |
| Mammalia       | Artiodactyla      | Bovidae         | Rupicapra_rupicapra        | 2.3                     | 0.35             | 0.09 | 5.2                     |
| Mammalia       | Artiodactyla      | Cervidae        | Alces_alces                | 2.5                     | 0.28             | 0.27 | 6.0                     |
| Mammalia       | Artiodactyla      | Cervidae        | Cervus_elaphus             | 2.8                     | 0.23             | 0.12 | 7.2                     |
| Mammalia       | Artiodactyla      | Cervidae        | Odocoileus_hemionus        | 1.9                     | 0.30             | 0.50 | 5.2                     |
| Mammalia       | Artiodactyla      | Cervidae        | Rangifer_tarandus          | 3.3                     | 0.16             | 0.26 | 9.6                     |

|          |                |                  |                            |      |      |       |      |
|----------|----------------|------------------|----------------------------|------|------|-------|------|
| Mammalia | Artiodactyla   | Hippopotamidae   | Hippopotamus_amphibius     | 5.5  | 0.06 | 0.06  | 22.2 |
| Mammalia | Artiodactyla   | Suidae           | Phacochoerus_aethiopicus   | 2.1  | 0.34 | 0.46  | 5.1  |
| Mammalia | Artiodactyla   | Suidae           | Sus_scrofa                 | 1.9  | 0.55 | 0.98  | 3.7  |
| Mammalia | Carnivora      | Canidae          | Alopex_lagopus             | 0.9  | 0.66 | 2.64  | 2.4  |
| Mammalia | Carnivora      | Canidae          | Canis_lupus                | 1.0  | 0.55 | 1.63  | 2.8  |
| Mammalia | Carnivora      | Canidae          | Urocyon_cinereoargenteus   | 1.1  | 0.35 | 1.06  | 3.9  |
| Mammalia | Carnivora      | Canidae          | Vulpes_vulpes              | 1.0  | 0.55 | 1.78  | 2.8  |
| Mammalia | Carnivora      | Felidae          | Felis_catus                | 1.0  | 0.83 | 1.92  | 2.2  |
| Mammalia | Carnivora      | Felidae          | Lynx_rufus                 | 1.3  | 0.62 | 0.91  | 2.9  |
| Mammalia | Carnivora      | Mustelidae       | Lontra_canadensis          | 3.2  | 0.26 | 0.48  | 7.1  |
| Mammalia | Carnivora      | Mustelidae       | Mephitis_mephitis          | 1.0  | 0.73 | 1.52  | 2.4  |
| Mammalia | Carnivora      | Mustelidae       | Mustela_putorius           | 1.0  | 0.35 | 1.73  | 3.9  |
| Mammalia | Carnivora      | Mustelidae       | Taxidea_taxus              | 1.6  | 0.64 | 0.38  | 3.2  |
| Mammalia | Carnivora      | Otariidae        | Callorhinus_ursinus        | 4.7  | 0.12 | 0.13  | 13.0 |
| Mammalia | Carnivora      | Phocidae         | Halichoerus_grypus         | 5.0  | 0.14 | 0.12  | 12.1 |
| Mammalia | Carnivora      | Phocidae         | Mirounga_leonina           | 5.2  | 0.25 | 0.08  | 9.2  |
| Mammalia | Carnivora      | Phocidae         | Pusa_hispida               | 4.2  | 0.10 | 0.15  | 14.2 |
| Mammalia | Carnivora      | Ursidae          | Ailuropoda_melanoleuca     | 7.0  | 0.24 | 0.12  | 11.2 |
| Mammalia | Carnivora      | Ursidae          | Ursus_americanus           | 5.0  | 0.18 | 0.23  | 10.6 |
| Mammalia | Cetacea        | Balaenopteridae  | Balaenoptera_acutorostrata | 8.0  | 0.10 | 0.10  | 18.0 |
| Mammalia | Cetacea        | Balaenopteridae  | Balaenoptera_borealis      | 7.0  | 0.07 | 0.08  | 21.3 |
| Mammalia | Cetacea        | Balaenopteridae  | Balaenoptera_physalus      | 11.0 | 0.05 | 0.07  | 31.0 |
| Mammalia | Cetacea        | Delphinidae      | Delphinapterus_leucas      | 7.0  | 0.13 | 0.02  | 14.7 |
| Mammalia | Cetacea        | Delphinidae      | Globicephala_melas         | 7.0  | 0.07 | 0.05  | 21.3 |
| Mammalia | Cetacea        | Delphinidae      | Orcinus_orca               | 15.0 | 0.02 | 0.04  | 65.0 |
| Mammalia | Cetacea        | Delphinidae      | Stenella_attenuata         | 11.0 | 0.10 | 0.03  | 21.0 |
| Mammalia | Cetacea        | Delphinidae      | Tursiops_sp                | 10.0 | 0.02 | 0.11  | 60.0 |
| Mammalia | Cetacea        | Eschrichtiidae   | Eschrichtius_robustus      | 9.0  | 0.06 | 0.08  | 25.7 |
| Mammalia | Cetacea        | Monodontidae     | Monodon_monoceros          | 7.5  | 0.11 | 0.03  | 16.6 |
| Mammalia | Cetacea        | Physeteridae     | Physeter_macrocephalus     | 11.2 | 0.06 | 0.02  | 27.9 |
| Mammalia | Chiroptera     | Rhinolophidae    | Rhinolophus_ferrumequinum  | 3.0  | 0.24 | 0.11  | 7.2  |
| Mammalia | Chiroptera     | Vespertilionidae | Eptesicus_fuscus           | 1.0  | 0.29 | 0.45  | 4.4  |
| Mammalia | Chiroptera     | Vespertilionidae | Pipistrellus_pipistrellus  | 2.0  | 0.46 | 0.24  | 4.2  |
| Mammalia | Chiroptera     | Vespertilionidae | Pipistrellus_subflavus     | 2.0  | 0.55 | 0.21  | 3.8  |
| Mammalia | Insectivora    | Erinaceidae      | Erinaceus_europaeus        | 1.0  | 0.40 | 1.91  | 3.5  |
| Mammalia | Insectivora    | Talpidae         | Talpa_europaea             | 1.0  | 0.73 | 1.21  | 2.4  |
| Mammalia | Lagomorpha     | Leporidae        | Lepus_europaeus            | 0.7  | 0.70 | 4.35  | 2.1  |
| Mammalia | Lagomorpha     | Leporidae        | Oryctolagus_cuniculus      | 0.5  | 3.40 | 6.53  | 0.8  |
| Mammalia | Lagomorpha     | Leporidae        | Sylvilagus_floridanus      | 0.4  | 1.54 | 7.41  | 1.0  |
| Mammalia | Lagomorpha     | Ochotonidae      | Ochotona_princeps          | 0.8  | 0.56 | 2.23  | 2.6  |
| Mammalia | Perissodactyla | Equidae          | Equus_caballus             | 4.0  | 0.12 | 0.08  | 12.3 |
| Mammalia | Perissodactyla | Equidae          | Equus_burchellii           | 3.0  | 0.12 | 0.11  | 11.3 |
| Mammalia | Primates       | Cercopithecidae  | Macaca_sinica              | 4.7  | 0.06 | 0.14  | 21.4 |
| Mammalia | Primates       | Hominidae        | Pan_troglodytes            | 11.8 | 0.07 | 0.05  | 26.1 |
| Mammalia | Proboscidea    | Elephantidae     | Loxodonta_africana         | 15.0 | 0.06 | 0.01  | 31.6 |
| Mammalia | Rodentia       | Dipodidae        | Zapus_princeps             | 1.3  | 0.62 | 1.04  | 2.9  |
| Mammalia | Rodentia       | Miocastoridae    | Myocastor_coyopus          | 0.7  | 0.95 | 4.11  | 1.8  |
| Mammalia | Rodentia       | Muridae          | Apodemus_flavicollis       | 0.2  | 3.64 | 10.02 | 0.5  |
| Mammalia | Rodentia       | Muridae          | Clethrionomys_glareolus    | 0.2  | 3.29 | 16.41 | 0.5  |
| Mammalia | Rodentia       | Muridae          | Peromyscus_maniculatus     | 0.2  | 3.79 | 15.88 | 0.5  |
| Mammalia | Rodentia       | Muridae          | Tachyoryctes_splendens     | 0.4  | 0.54 | 2.73  | 2.3  |
| Mammalia | Rodentia       | Sciuridae        | Marmota_flaviventris       | 3.0  | 0.40 | 0.43  | 5.5  |
| Mammalia | Rodentia       | Sciuridae        | Sciurus_carolinensis       | 0.8  | 0.59 | 2.46  | 2.5  |
| Mammalia | Rodentia       | Sciuridae        | Spermophilus_lateralis     | 1.4  | 0.60 | 0.99  | 3.1  |
| Mammalia | Rodentia       | Sciuridae        | Spermophilus_armatus       | 1.0  | 0.66 | 1.51  | 2.5  |
| Mammalia | Rodentia       | Sciuridae        | Spermophilus_beldingi      | 1.0  | 0.65 | 1.62  | 2.5  |
| Mammalia | Rodentia       | Sciuridae        | Tamias_striatus            | 0.6  | 1.32 | 3.39  | 1.4  |
| Mammalia | Rodentia       | Sciuridae        | Tamiasciurus_hudsonicus    | 1.1  | 0.68 | 1.20  | 2.6  |
